# Supplementary material for: Hydrologic implications of projected changes in rain-on-snow melt for Great Lakes Basin watersheds
Source: Copernicus journal article supplement (doi:10.5194/egusphere-2022-657), 2022-09-16
Supplement: Supplementary file 1 [file egusphere-2022-657-supplement.pdf]

**Table S1.** Modeling center and institution names. Adapted from CMIP5 Model Groups and their Terms of Use (<https://pcmdi.llnl.gov/mips/cmip5/availability.html>)

| Center                       | Model                        | Institution                                                                                                                                                               |
|------------------------------|------------------------------|---------------------------------------------------------------------------------------------------------------------------------------------------------------------------|
| <a href="#">CSIRO-BOM</a>    | ACCESS1.0                    | CSIRO (Commonwealth Scientific and Industrial Research Organisation), and BOM (Bureau of Meteorology), Australia                                                          |
| BCC                          | BCC-CSM1.1                   | Beijing Climate Center, China Meteorological Admin.                                                                                                                       |
| CCCma                        | CanESM2                      | Canadian Centre for Climate Modelling and Analysis                                                                                                                        |
| NCAR                         | CCSM4                        | National Center for Atmospheric Research                                                                                                                                  |
| NSF-DOE-NCAR                 | CESM1(BGC)                   | National Science Foundation, Department of Energy, National Center for Atmospheric Research                                                                               |
| <a href="#">CNRM-CERFACS</a> | CNRM-CM5                     | Centre National de Recherches Meteorologiques / Centre Europeen de Recherche et Formation Avancees en Calcul Scientifique                                                 |
| <a href="#">CSIRO-QCCCE</a>  | CSIRO-Mk3.6.0                | Commonwealth Scientific and Industrial Research Organisation, Queensland Climate Change Centre of Excellence                                                              |
| <a href="#">NOAA GFDL</a>    | GFDL-ESM2G<br>GFDL-ESM2M     | Geophysical Fluid Dynamics Laboratory                                                                                                                                     |
| INM                          | INM-CM4                      | Institute for Numerical Mathematics                                                                                                                                       |
| <a href="#">IPSL</a>         | IPSL-CM5A-LR<br>IPSL-CM5A-MR | Institut Pierre-Simon Laplace                                                                                                                                             |
| MIROC                        | MIROC5                       | Atmosphere and Ocean Research Institute (The University of Tokyo), National Institute for Environmental Studies, and Japan Agency for Marine-Earth Science and Technology |
| MIROC                        | MIROC-ESM<br>MIROC-ESM-CHEM  | Japan Agency for Marine-Earth Science and Technology, Atmosphere and Ocean Research Institute (The University of Tokyo), and National Institute for Environmental Studies |
| MPI-M                        | MPI-ESM-LR<br>MPI-ESM-MR     | Max Planck Institute for Meteorology (MPI-M)                                                                                                                              |
| MRI                          | MRI-CGCM3                    | Meteorological Research Institute                                                                                                                                         |
| NCC                          | NorESM1-M                    | Norwegian Climate Centre                                                                                                                                                  |

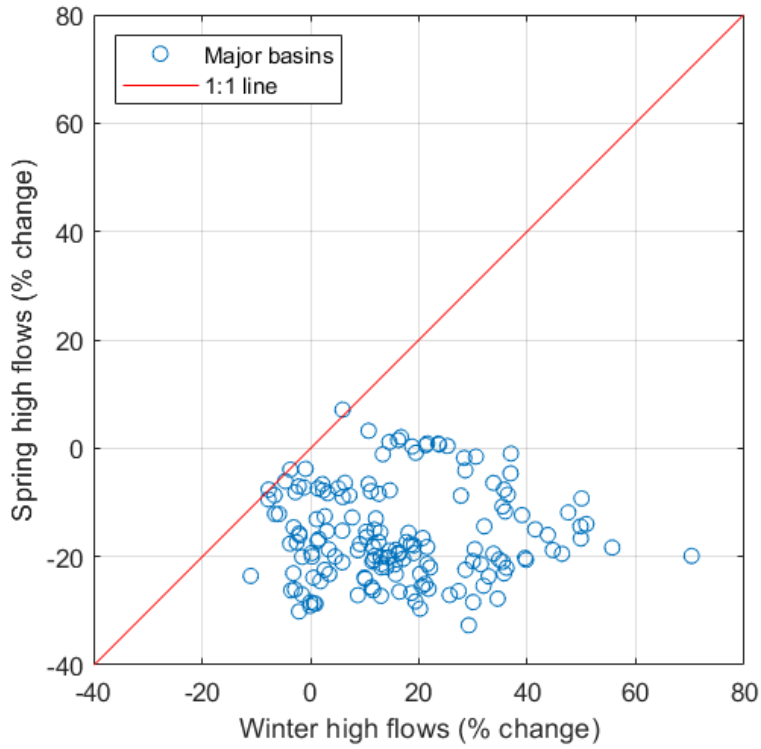

**Figure S1.** Projected percent changes in extreme (0.95 quantile) winter (December through February) and spring (March through May) daily water yields between the historic 1960-1999 period and mid-21<sup>st</sup> century. Markers represent projections of the RCP 4.5 ensemble mean for individual major river basins.
